# Supplementary material for: Alcohol-gating femtosecond laser-induced micro/nano-structured membranes with reversible switching wettability and breathability
Source: Royal Society of Chemistry journal article supplement (doi:10.1039/d4mh00913d), 2024-01-01
Supplement: d4mh00913d1.pdf [file d4mh00913d1.pdf]

Electronic Supplementary Material (ESI) for Materials Horizons.  
This journal is © The Royal Society of Chemistry 2024

## Supplementary Information

### **Alcohol gating femtosecond laser induced micro/nano-structured membranes with reversible switching wettability and breathability**

Jiaqing Pei,<sup>a</sup> Kai Yin, <sup>\*abc</sup> Xinghao Song,<sup>a</sup> Pengyu Yang,<sup>a</sup> Lingxiao Wang,<sup>a</sup> Yin

Huang,<sup>a</sup> Saif Ullah Awan<sup>d</sup> and Ahmed S. G. Khalil<sup>ef</sup>

\*Corresponding to [kaiyin@csu.edu.cn](mailto:kaiyin@csu.edu.cn)

Contents:

Supplementary Figures S1 to S12

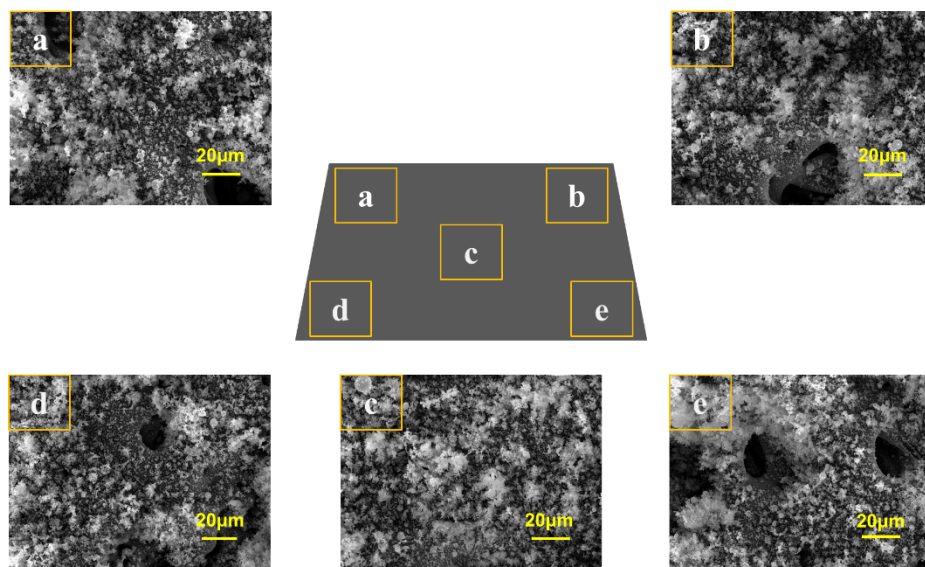

Figure S1. SEM images of various positions of the LT-PTFE surface.

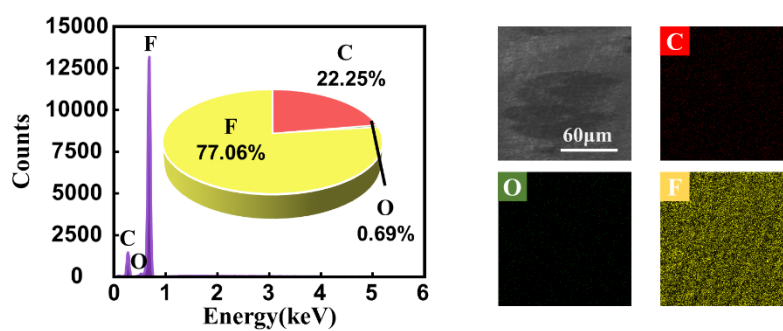

Figure S2. Elemental chemical composition and maps for the pristine PTFE surfaces.

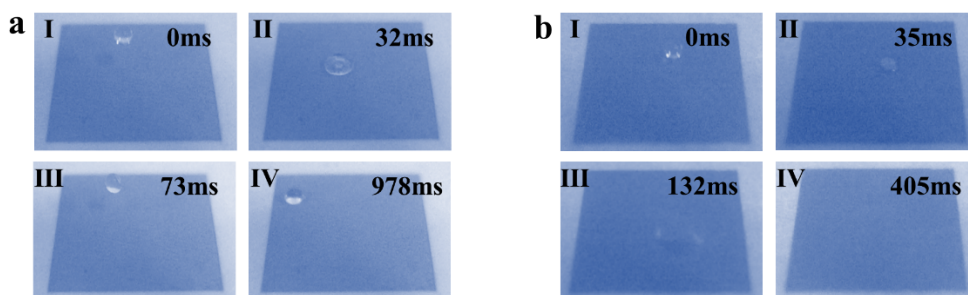

Figure S3. The process of water impacting the (a) LT-PTFE surface and (b) LT-PTFE-A surface.

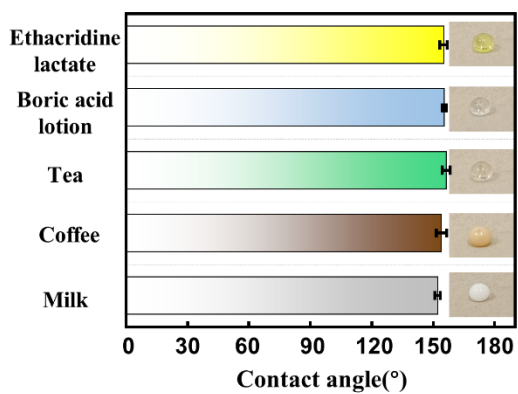

Figure S4. Contact angles for different liquids on the LT-PTFE surfaces.

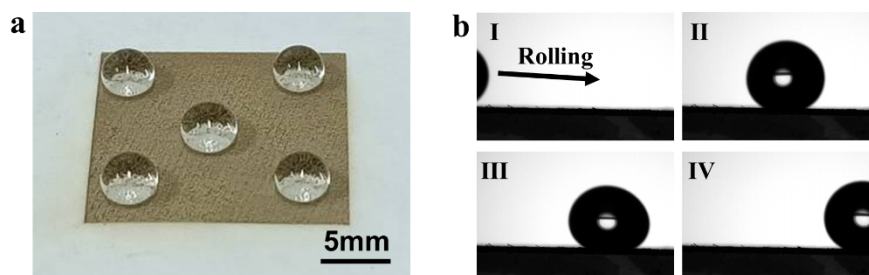

Figure S5. (a) WACs of various positions for the LT-PTFE surface. (b) Time-resolved pictures of a water droplet sliding ( $\sim 1.4^\circ$ ) on the LT-PTFE surface.

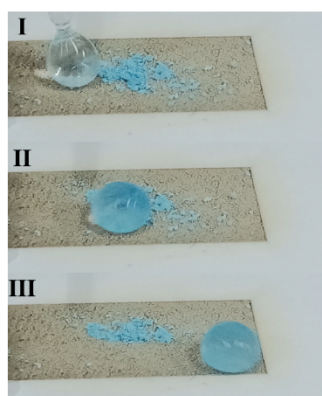

Figure S6. Self-cleaning demonstration of the LT-PTFE surface.

| Energy percentage(%) | Power(mW) |
|----------------------|-----------|
| 45                   | 779       |
| 50                   | 1113      |
| 55                   | 1485      |
| 60                   | 1852      |
| 65                   | 2320      |
| 70                   | 2610      |

Figure S7. Different energy percentages corresponding to practical laser processing energy.

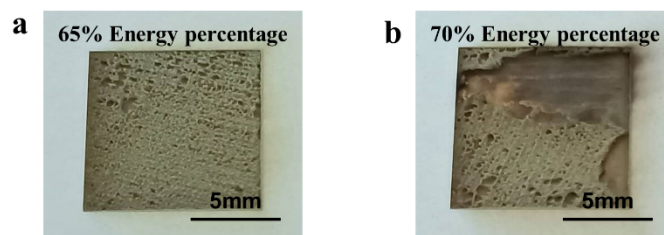

Figure S8. PTFE processed via (a) 65% energy percentage and (b) 70% energy percentage laser.

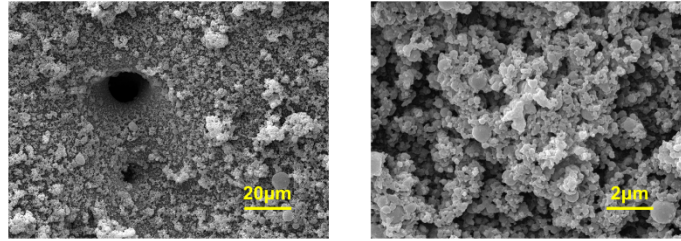

Figure S9. SEM images of different magnifications of the LT-PTFE surfaces after 100 times dropping/drying alcohol cycle.

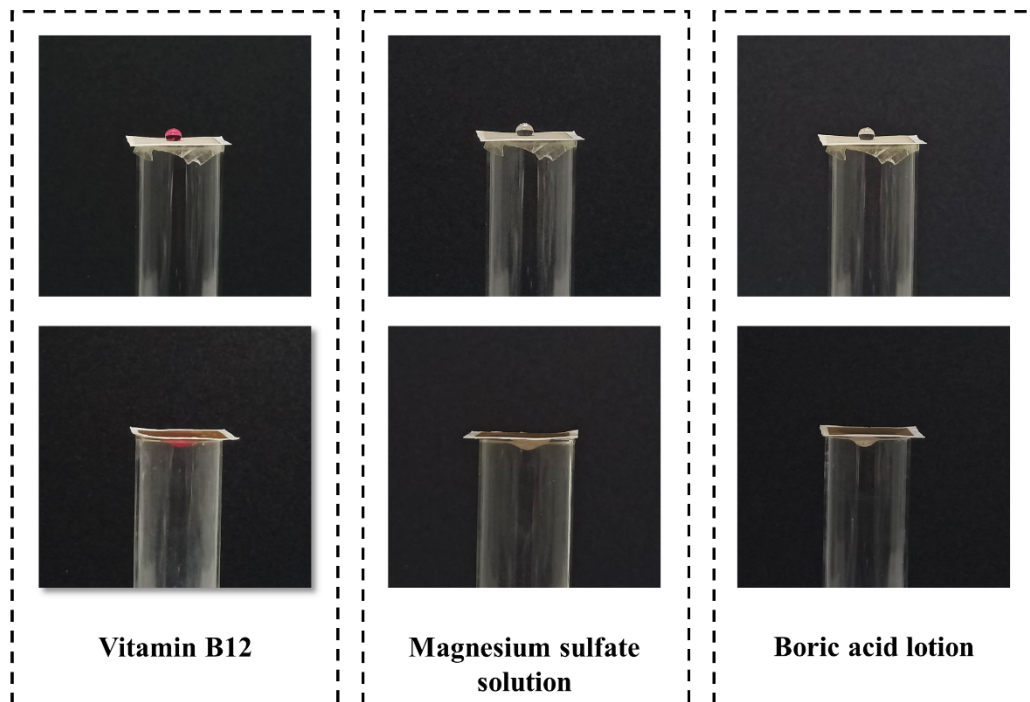

Figure S10. Wetting behaviors of various medicine droplet contact LT-PTFE and LT-PTFE-A surfaces.

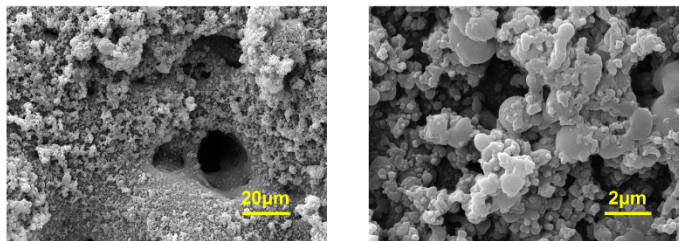

Figure S11. SEM images of different magnifications of the LT-PTFE-20C surfaces.

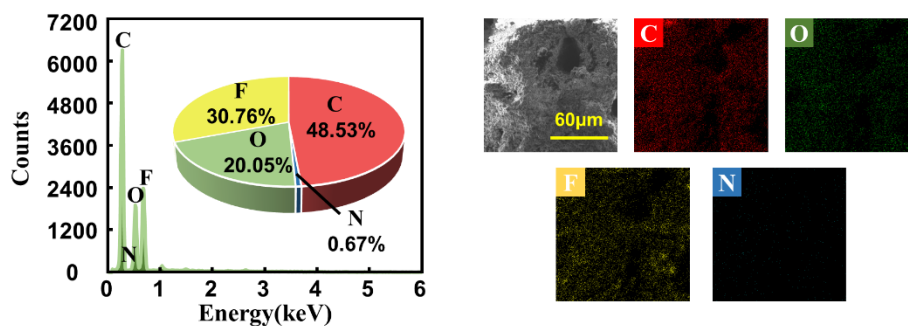

Figure S12. Elemental chemical composition and maps for the LT-PTFE-20C surfaces.
